# Supplementary material for: Interferon-gamma signature as prognostic and predictive marker in macroscopic stage III melanoma
Source: PubMed Central journal article supplement — J Immunother Cancer. 2024 Apr 27;12(4):e008125. doi: 10.1136/jitc-2023-008125 (PMC11057279; doi:10.1136/jitc-2023-008125), 2024-04-27
Supplement: jitc-2023-008125supp002.pdf [file jitc-2023-008125supp002.pdf]

## SUPPLEMENTARY APPENDIX

Supplement to: 'Interferon-gamma signature as prognostic and predictive marker in macroscopic stage III melanoma'

| <b>Content</b>                                                                                                              | <b>Page</b> |
|-----------------------------------------------------------------------------------------------------------------------------|-------------|
| <b>Table S1.</b> Characteristics of patients who received adjuvant therapy in discovery cohort 2                            | 2           |
| <b>Table S2.</b> Cox regression analyses                                                                                    | 3           |
| <b>Table S3.</b> Baseline characteristics of patients of whom RNA sequencing data is available                              | 4           |
| <b>Table S4.</b> Correlation IFN $\gamma$ with clinical parameters in all patients of whom RNA sequencing data is available | 6           |
| <b>Table S5.</b> Baseline characteristics of patients of whom PD-L1 expression data is available                            | 7           |
| <b>Figure S1.</b> Flow diagram of patient selection                                                                         | 9           |
| <b>Figure S2.</b> Interferon-gamma score                                                                                    | 10          |
| <b>Figure S3.</b> Overview of immune subsets of DanaHER                                                                     | 11          |
| <b>Figure S4.</b> Overview of immune subsets of the MCP counter                                                             | 12          |
| <b>Figure S5.</b> B cell score                                                                                              | 13          |
| <b>Figure S6.</b> CD20 and CD3 staining                                                                                     | 14          |
| <b>Figure S7.</b> PD-L1 staining                                                                                            | 16          |

**Table S1.** Characteristics of patients who received adjuvant therapy in discovery cohort 2

|                                                  | N                     | %   |
|--------------------------------------------------|-----------------------|-----|
| <b>Type of adjuvant therapy</b>                  |                       |     |
| Anti-PD-1 <sup>a</sup>                           | 39                    | 100 |
| <b>Time to start adjuvant therapy (in weeks)</b> |                       |     |
| Median                                           | 9.0                   |     |
| IQR                                              | 7.9-11.7              |     |
| Range                                            | 4.0-23.1 <sup>b</sup> |     |
| <b>Treatment ongoing</b>                         |                       |     |
| No                                               | 39                    | 100 |
| <b>Time on adjuvant treatment</b>                |                       |     |
| Median                                           | 10                    |     |
| IQR                                              | 3-10                  |     |
| Range                                            | 0-12                  |     |
| <b>Reason stop end of adjuvant therapy</b>       |                       |     |
| End of treatment                                 | 22                    | 56  |
| Toxicity <sup>c</sup>                            | 6                     | 15  |
| Recurrence                                       | 10                    | 26  |
| Other <sup>d</sup>                               | 1                     | 3   |
| <b>COVID break</b>                               |                       |     |
| No                                               | 24                    | 62  |
| Yes <sup>e</sup>                                 | 15                    | 39  |

Characteristics of adjuvant therapy, reported for the 39 patients who received at least 1 dose of adjuvant therapy.

Reported as number (%), percentages may not total 100 due to rounding.

<sup>a</sup> One patient participated in a trial and was randomized between either anti-PD-1 monotherapy, or combination anti-PD-1 and anti-CTLA-4. <sup>b</sup> One patient started with targeted therapy, due to COVID, but switched to anti-PD-1 due to toxicity. <sup>c</sup> One patient was first treated with targeted therapy due to logistic challenges following the COVID-19 pandemic, then proceeded with adjuvant anti-PD-1. <sup>d</sup> One patient skipped two cycles due to COVID break, did not receive last cycle due to abscess in appendectomy scar. <sup>e</sup> COVID break: eight patients completed 10 cycles instead of 12, 1 patient received 11 cycles and 1 patient had a delayed start of treatment.

**Table S2.** Cox regression analyses

|                         | Crude HR<br>(95% CI)    | P value          | Adjusted HR<br>(95% CI) | P value          |
|-------------------------|-------------------------|------------------|-------------------------|------------------|
| <b>Age</b>              | 1.01 (0.99-1.03)        | 0.513            |                         |                  |
| <b>Sex</b>              | 1.46 (0.88-2.44)        | 0.143            |                         |                  |
| <b>Mutation status</b>  |                         |                  |                         |                  |
| BRAF                    | 1.62 (0.39-6.75)        | 0.505            |                         |                  |
| NRAS                    | 1.52 (0.35-6.65)        | 0.578            |                         |                  |
| cKIT                    | 2.82 (0.25-31.37)       | 0.398            |                         |                  |
| No driver mutations     | 2.16 (0.46-10.19)       | 0.330            |                         |                  |
| Unknown                 | ref                     |                  |                         |                  |
| <b>Type of surgery</b>  |                         |                  |                         |                  |
| LND                     | <b>0.31 (0.21-0.81)</b> | <b>0.010</b>     | 0.69 (0.34-1.43)        | 0.325            |
| ITM                     | 0.61 (0.28-1.33)        | 0.212            | 0.98 (0.44-2.23)        | 0.975            |
| LND + ITM               | 0.59 (0.23-1.50)        | 0.266            | 0.81 (0.31-2.09)        | 0.661            |
| ILP ± LND               | ref                     |                  | ref                     |                  |
| <b>S100b</b>            | <b>2.39 (1.23-4.63)</b> | <b>0.010</b>     | <b>2.64 (1.29-5.38)</b> | <b>0.008</b>     |
| <b>LDH</b>              | 1.85 (0.66-5.19)        | 0.243            |                         |                  |
| <b>Adjuvant therapy</b> | <b>0.25 (0.14-0.45)</b> | <b>&lt;0.001</b> | <b>0.25 (0.13-0.48)</b> | <b>&lt;0.001</b> |

HR: hazard ratio; CI: confidence interval; LND: lymph node dissection; ITM: in-transit metastasis; ILP: isolated limb perfusion.

**Table S3.** Baseline characteristics of patients of whom RNA sequencing data is available

|                                            |                     | Observation cohort 1A |               | Adjuvant treatment cohort 2A |               |
|--------------------------------------------|---------------------|-----------------------|---------------|------------------------------|---------------|
|                                            |                     | Recurrence            | No recurrence | Recurrence                   | No recurrence |
|                                            |                     | N=18                  | N=6           | N=9                          | N=15          |
| <b>Age</b>                                 |                     |                       |               |                              |               |
|                                            | Median              | 71                    | 73            | 55                           | 61            |
|                                            | Range               | 55-77                 | 57-82         | 45-63                        | 54-73         |
| <b>Sex</b>                                 |                     |                       |               |                              |               |
|                                            | Male                | 11 (61)               | 3 (50)        | 4 (44)                       | 7 (47)        |
|                                            | Female              | 7 (39)                | 3 (50)        | 5 (56)                       | 8 (53)        |
| <b>Site primary</b>                        |                     |                       |               |                              |               |
|                                            | Extremities         | 13 (72)               | 3 (50)        | 4 (44)                       | 8 (53)        |
|                                            | Trunk               | 4 (22)                | 3 (50)        | 5 (56)                       | 5 (33)        |
|                                            | Head&neck           | 0                     | 0             | 0                            | 1 (7)         |
|                                            | Acral               | 0                     | 0             | 0                            | 1 (7)         |
|                                            | Mucosal             | 1 (6)                 | 0             | 0                            | 0             |
|                                            | MUP                 | 0                     | 0             | 0                            | 0             |
| <b>Breslow thickness</b>                   |                     |                       |               |                              |               |
|                                            | ≤1.0mm              | 1 (6)                 | 0             | 0                            | 3 (20)        |
|                                            | 1.01-2.0            | 4 (22)                | 1 (17)        | 2 (22)                       | 2 (13)        |
|                                            | 2.01-4.0            | 6 (33)                | 4 (80)        | 5 (56)                       | 4 (27)        |
|                                            | >4.0                | 5 (28)                | 0             | 1 (11)                       | 6 (40)        |
|                                            | Unknown             | 2 (11)                | 1 (17)        | 1 (11)                       | 0             |
| <b>Ulceration</b>                          |                     |                       |               |                              |               |
|                                            | No                  | 6 (33)                | 3 (50)        | 6 (67)                       | 11 (73)       |
|                                            | Yes                 | 7 (39)                | 2 (33)        | 1 (11)                       | 3 (20)        |
|                                            | Unknown             | 5 (2)                 | 1 (17)        | 2 (22)                       | 1 (7)         |
| <b>Stage (AJCC 8<sup>th</sup> edition)</b> |                     |                       |               |                              |               |
|                                            | IIIB                | 2 (11)                | 1 (17)        | 2 (22)                       | 4 (27)        |
|                                            | IIIC                | 16 (89)               | 4 (67)        | 6 (67)                       | 10 (67)       |
|                                            | IIID                | 0                     | 0             | 0                            | 1 (7)         |
|                                            | Unknown             | 0                     | 1 (17)        | 1 (11)                       | 0             |
| <b>Mutation status</b>                     |                     |                       |               |                              |               |
|                                            | BRAF                | 9 (50)                | 4 (67)        | 6 (67)                       | 9 (60)        |
|                                            | NRAS                | 6 (33)                | 1 (17)        | 1 (11)                       | 6 (40)        |
|                                            | cKIT                | 1 (6)                 | 0             | 0                            | 0             |
|                                            | No driver mutations | 1 (6)                 | 0             | 2 (22)                       | 0             |
|                                            | Unknown             | 1 (6)                 | 1 (17)        | 0                            | 0             |
| <b>Type surgery</b>                        |                     |                       |               |                              |               |
|                                            | LND                 | 8 (44)                | 2 (33)        | 7 (78)                       | 11 (73)       |
|                                            | ITM                 | 2 (11)                | 2 (33)        | 0                            | 3 (20)        |
|                                            | LND + ITM           | 2 (11)                | 1 (17)        | 2 (22)                       | 1 (7)         |
|                                            | ILP ± LND           | 6 (33)                | 1 (17)        | 0                            | 0             |
| <b>Type sample</b>                         |                     |                       |               |                              |               |
|                                            | LND                 | 12 (67)               | 3 (50)        | 9 (100)                      | 12 (80)       |
|                                            | ITM                 | 6 (33)                | 3 (50)        | 0                            | 3 (20)        |
| <b>S100b</b>                               |                     |                       |               |                              |               |
|                                            | ≤ULN                | 14 (78)               | 6 (100)       | 7 (78)                       | 14 (93)       |
|                                            | >ULN                | 2 (11)                | 0             | 1 (11)                       | 1 (7)         |
|                                            | Unknown             | 2 (11)                | 0             | 1 (11)                       | 0             |
| <b>LDH</b>                                 |                     |                       |               |                              |               |
|                                            | ≤ULN                | 16 (89)               | 4 (67)        | 8 (89)                       | 15 (100)      |
|                                            | >ULN                | 1 (6)                 | 2 (33)        | 0                            | 0             |
|                                            | Unknown             | 1 (6)                 | 0             | 1 (14)                       | 0             |

Baseline characteristics of patients of whom RNA sequencing data is available, reported per cohort for patient with and without recurrence.

Reported as number (%), percentages may not total 100 due to rounding.

IQR: interquartile range; MUP: melanoma of unknown primary; LND: lymph node dissection; ITM: in-transit metastasis; ILP: isolated limb perfusion; ULN: upper limit of normal; LDH: lactate dehydrogenase.

**Table S4.** Correlation IFN $\gamma$  with clinical parameters in all patients of whom RNA sequencing data is available

|                                            | <b>Pearson coefficient</b> | <b>P value</b> | <b>Spearman coefficient</b> | <b>P value</b> |
|--------------------------------------------|----------------------------|----------------|-----------------------------|----------------|
| <b>T stage</b>                             | 0.140                      | 0.295          | 0.154                       | 0.248          |
| <b>Stage (AJCC 8<sup>th</sup> edition)</b> | 0.021                      | 0.871          | 0.095                       | 0.455          |
| <b>Breslow thickness</b>                   | -0.182                     | 0.151          | -0.063                      | 0.621          |
| <b>Ulceration</b>                          | -0.042                     | 0.744          | -0.020                      | 0.877          |
| <b>S100B surgery</b>                       | 0.169                      | 0.181          | -0.031                      | 0.811          |
| <b>S100B adjuvant</b>                      | 0.223                      | 0.307          | 0.234                       | 0.282          |
| <b>LDH surgery</b>                         | -0.020                     | 0.875          | -0.073                      | 0.568          |
| <b>LDH adjuvant</b>                        | 0.141                      | 0.522          | 0.176                       | 0.423          |
| <b>Age</b>                                 | -0.021                     | 0.868          | -0.009                      | 0.946          |
| <b>Mutation status</b>                     | -0.035                     | 0.783          | 0.003                       | 0.979          |
| <b>Type of surgery</b>                     | -0.111                     | 0.382          | -0.125                      | 0.326          |

Correlation of interferon-gamma (IFN $\gamma$ ) with known prognostic clinical parameters.

LDH: lactate dehydrogenase.

**Table S5.** Baseline characteristics of patients of whom PD-L1 expression data is available

|                                            |                     | Observation cohort 1B |               | Adjuvant treatment cohort 2B |               |
|--------------------------------------------|---------------------|-----------------------|---------------|------------------------------|---------------|
|                                            |                     | Recurrence            | No recurrence | Recurrence                   | No recurrence |
|                                            |                     | N=21                  | N=7           | N=11                         | N=17          |
| <b>Age</b>                                 |                     |                       |               |                              |               |
|                                            | Median              | 67                    | 75            | 59                           | 61            |
|                                            | Range               | 51-74                 | 73-81         | 55-70                        | 54-71         |
| <b>Sex</b>                                 |                     |                       |               |                              |               |
|                                            | Male                | 9 (43)                | 4 (57)        | 5 (46)                       | 7 (41)        |
|                                            | Female              | 12 (57)               | 3 (43)        | 6 (55)                       | 10 (59)       |
| <b>Site primary</b>                        |                     |                       |               |                              |               |
|                                            | Extremities         | 14 (67)               | 3 (43)        | 4 (36)                       | 7 (41)        |
|                                            | Trunk               | 5 (24)                | 4 (57)        | 7 (64)                       | 9 (53)        |
|                                            | Head&neck           | 0                     | 0             | 0                            | 0             |
|                                            | Acral               | 0                     | 0             | 0                            | 1 (6)         |
|                                            | Mucosal             | 1 (5)                 | 0             | 0                            | 0             |
|                                            | MUP                 | 1 (5)                 | 0             | 0                            | 0             |
| <b>Breslow thickness</b>                   |                     |                       |               |                              |               |
|                                            | ≤1.0mm              | 1 (5)                 | 0             | 0                            | 3 (18)        |
|                                            | 1.01-2.0            | 5 (24)                | 2 (29)        | 1 (9)                        | 4 (24)        |
|                                            | 2.01-4.0            | 10 (48)               | 3 (43)        | 5 (6)                        | 4 (24)        |
|                                            | >4.0                | 3 (14)                | 1 (14)        | 3 (27)                       | 6 (35)        |
|                                            | Unknown             | 2 (10)                | 1 (14)        | 2 (18)                       | 0             |
| <b>Ulceration</b>                          |                     |                       |               |                              |               |
|                                            | No                  | 7 (33)                | 2 (29)        | 5 (45)                       | 10 (59)       |
|                                            | Yes                 | 7 (33)                | 3 (43)        | 3 (27)                       | 6 (35)        |
|                                            | Unknown             | 7 (33)                | 2 (29)        | 3 (27)                       | 1 (6)         |
| <b>Stage (AJCC 8<sup>th</sup> edition)</b> |                     |                       |               |                              |               |
|                                            | IIIB                | 1 (5)                 | 0             | 2 (18)                       | 4 (24)        |
|                                            | IIIC                | 20 (95)               | 6 (86)        | 8 (73)                       | 12 (71)       |
|                                            | IIID                | 0                     | 0             | 0                            | 1 (6)         |
|                                            | Unknown             | 0                     | 1 (14)        | 1 (9)                        | 0             |
| <b>Mutation status</b>                     |                     |                       |               |                              |               |
|                                            | BRAF                | 12 (57)               | 3 (43)        | 8 (73)                       | 11 (65)       |
|                                            | NRAS                | 5 (24)                | 0             | 2 (18)                       | 6 (35)        |
|                                            | cKIT                | 1 (5)                 | 0             | 0                            | 0             |
|                                            | No driver mutations | 2 (10)                | 2 (29)        | 1 (9)                        | 0             |
|                                            | Unknown             | 1 (5)                 | 2 (29)        | 0                            | 0             |
| <b>Type surgery</b>                        |                     |                       |               |                              |               |
|                                            | LND                 | 8 (38)                | 2 (29)        | 8 (73)                       | 12 (71)       |
|                                            | ITM                 | 6 (29)                | 2 (29)        | 1 (9)                        | 3 (18)        |
|                                            | LND + ITM           | 1 (5)                 | 2 (29)        | 2 (18)                       | 1 (6)         |
|                                            | ILP ± LND           | 6 (29)                | 1 (4)         | 0                            | 1 (6)         |
| <b>Type sample</b>                         |                     |                       |               |                              |               |
|                                            | LND                 | 12 (57)               | 4 (57)        | 10 (1)                       | 14 (82)       |
|                                            | ITM                 | 9 (43)                | 3 (43)        | 1 (9)                        | 3 (18)        |
| <b>S100b</b>                               |                     |                       |               |                              |               |
|                                            | ≤ULN                | 15 (71)               | 6 (86)        | 9 (82)                       | 16 (94)       |
|                                            | >ULN                | 4 (19)                | 0             | 2 (18)                       | 1 (6)         |
|                                            | Unknown             | 2 (10)                | 1 (14)        | 0                            | 0             |
| <b>LDH</b>                                 |                     |                       |               |                              |               |
|                                            | ≤ULN                | 15 (71)               | 4 (57)        | 10 (91)                      | 17 (100)      |
|                                            | >ULN                | 3 (14)                | 2 (29)        | 0                            | 0             |
|                                            | Unknown             | 3 (14)                | 1 (14)        | 1 (9)                        | 0             |

Baseline characteristics of patients of whom PD-L1 expression data is available, reported per cohort for patients with and without recurrence.

Reported as number (%), percentages may not total 100 due to rounding.

IQR: interquartile range; MUP: melanoma of unknown primary; LND: lymph node dissection; ITM: in-transit metastasis; ILP: isolated limb perfusion; ULN: upper limit of normal; LDH: lactate dehydrogenase.



**Figure S1.** Flow diagram of patient selection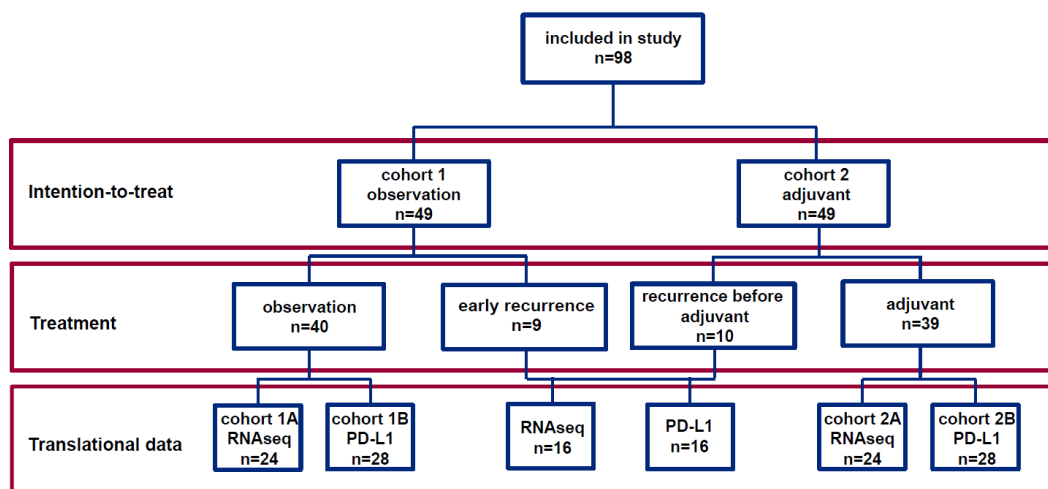

RNAseq: RNA sequencing.

**Figure S2.** Interferon-gamma score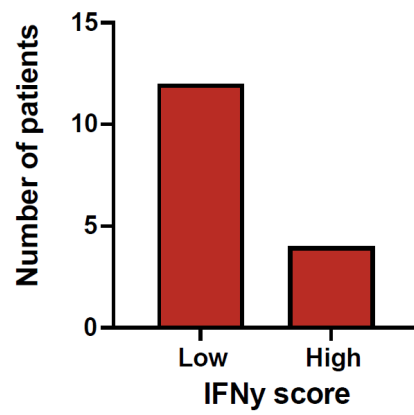

Bar plots with number of patients with an early recurrence with low and high IFN $\gamma$  score.

IFN $\gamma$ : interferon-gamma.

Figure S3. Overview of immune subsets of Danaher

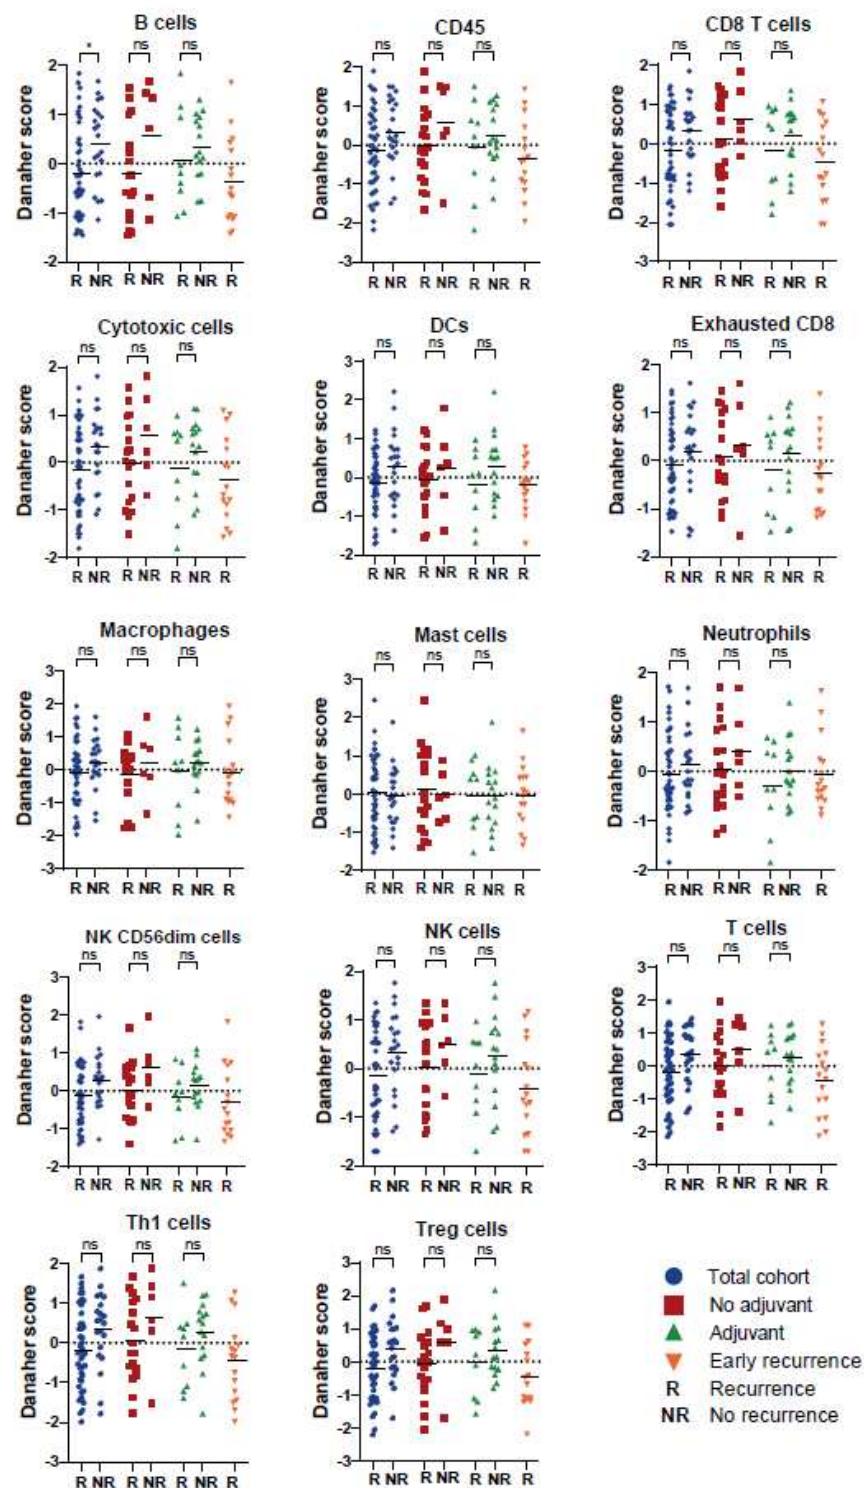

\*: significant difference ( $P < 0.005$ ); ns: not significant difference. Immune subsets as defined by Danaher et al. Gene expression markers of tumor infiltrating leukocytes. *J Immunother Cancer* 2017.

Figure S4. Overview of immune subsets of the MCP counter

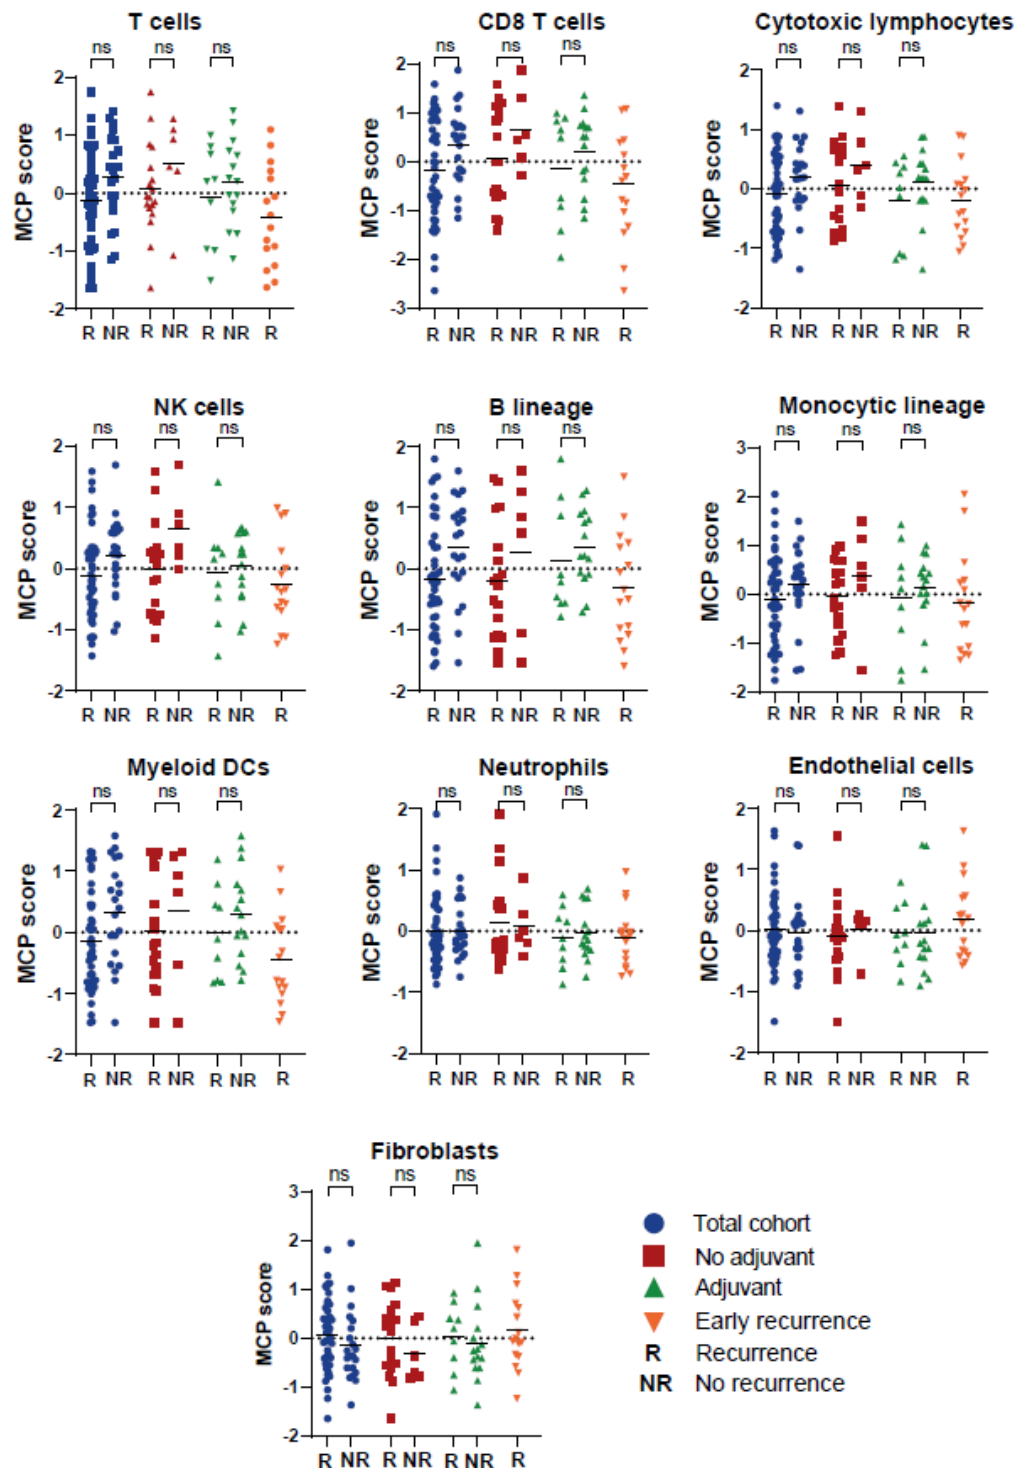

\*: significant difference ( $P < 0.005$ ); ns: not significant difference. Immune subsets as defined by Becht et al. Estimating the population abundance of tissue-infiltrating immune and stromal cell populations using gene expression. *Genome Biol* 2016.

**Figure S5. B cell score**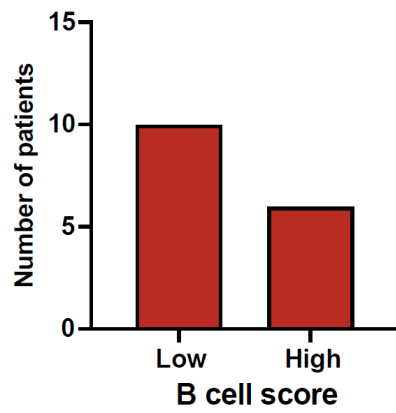

Bar plots with number of patients with an early recurrence with low and high B cell score.

Figure S6. CD20 and CD3 staining

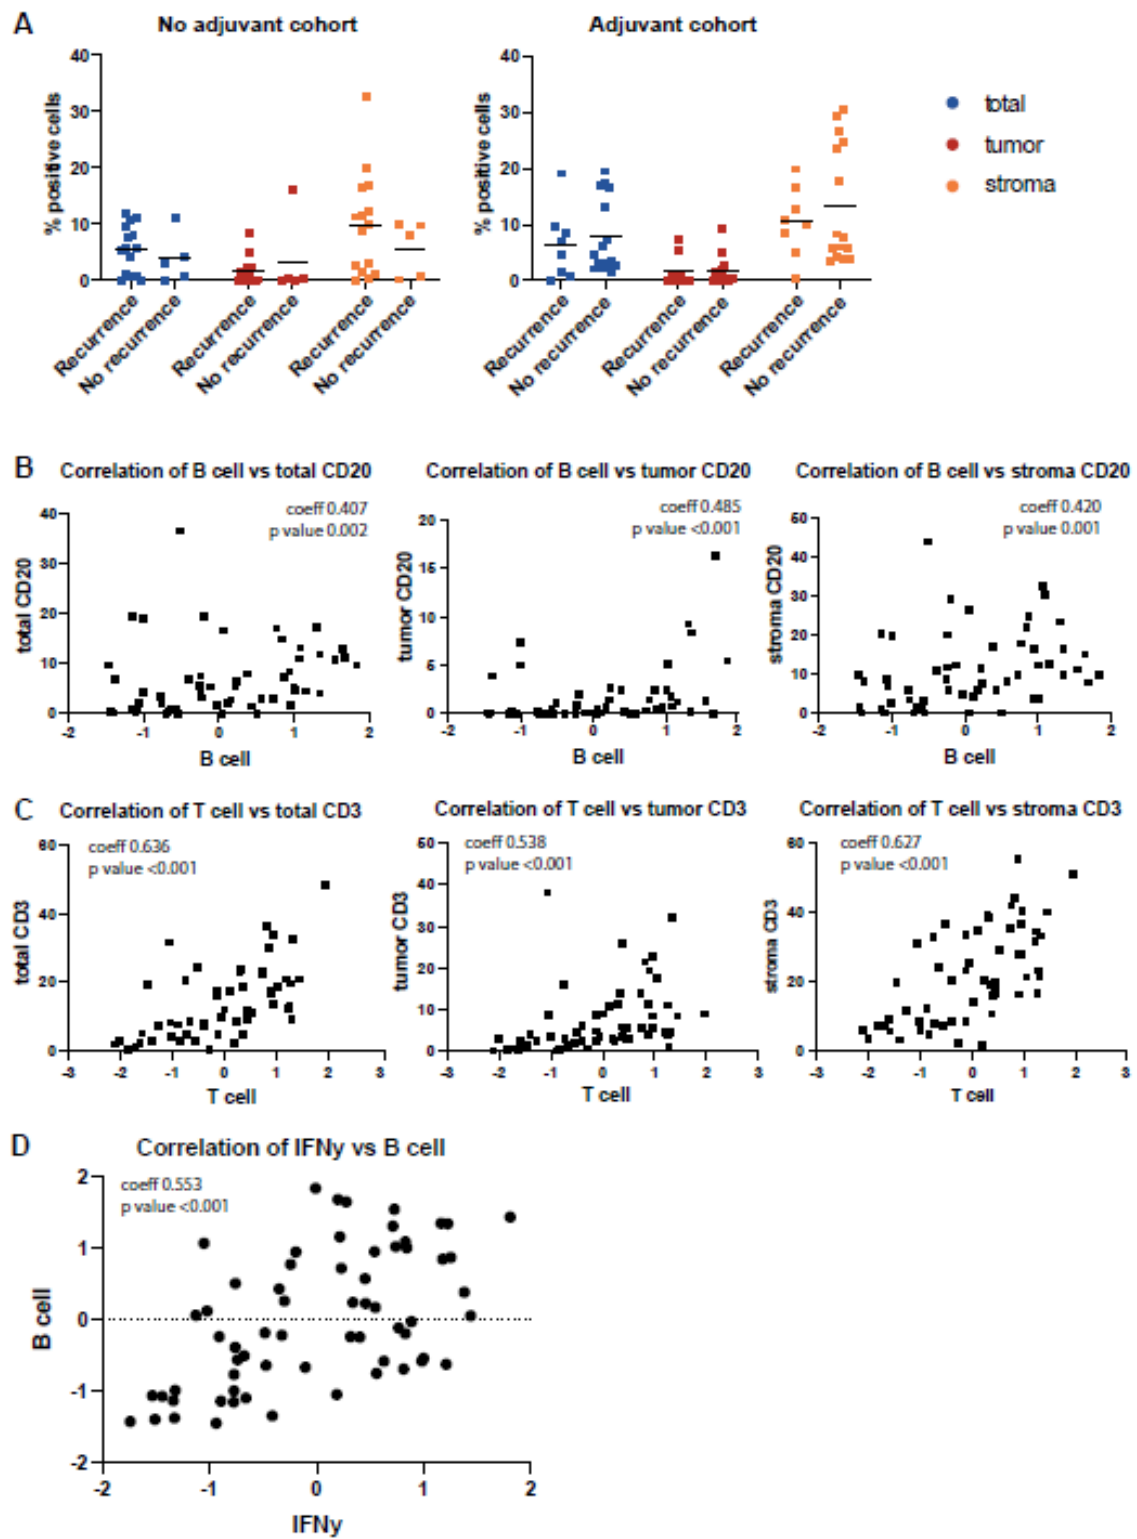

- A. Dot plots percentage CD20<sup>+</sup> cells of patients with and without recurrence reported for total sample, tumor and stroma area.
  - B. Correlation of B cell score based on RNAseq compared to percentage CD20<sup>+</sup> cells for the total samples, tumor and stroma area.
  - C. Correlation of T cell score based on RNAseq compared to percentage CD3<sup>+</sup> cells for the total samples, tumor and stroma area.
  - D. Correlation of B cell score compared to IFN $\gamma$  score.
- RNAseq: RNA sequencing.

**Figure S7. PD-L1 staining**

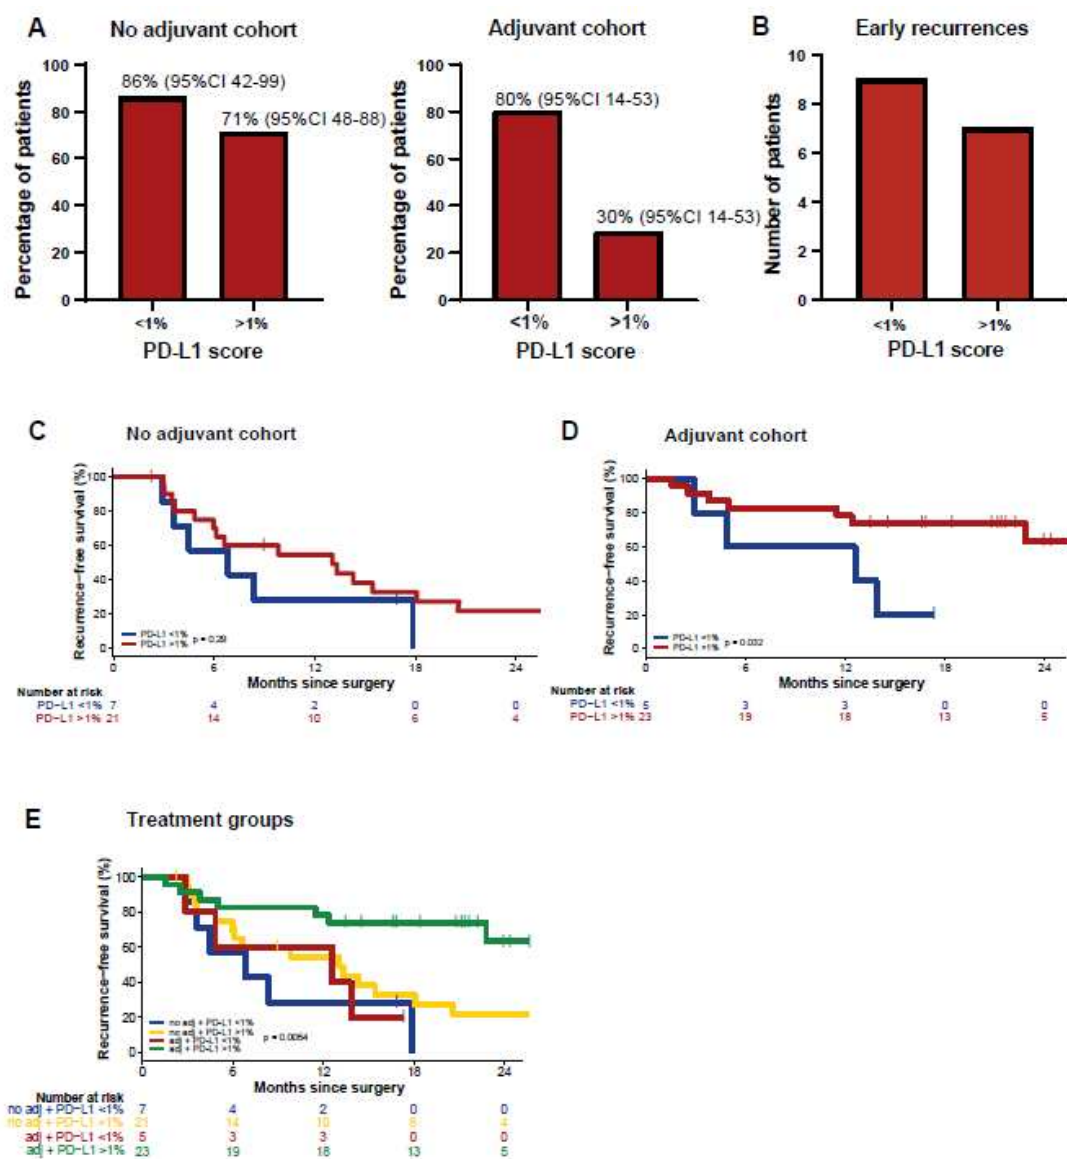

- A. Bar plots with percentage of patients with recurrence, split for a low and high PD-L1 score.
- B. Bar plots with number of patients with an early recurrence with low and high PD-L1 score.
- C. Recurrence-free survival for patients with a low versus a high PD-L1 score in the no adjuvant cohort.
- D. Recurrence-free survival for patients with a low versus a high PD-L1 score in the adjuvant cohort.
- E. Recurrence-free survival for patients with a low versus a high PD-L1 score for both the no adjuvant and adjuvant cohort.
